# Supplementary material for: The Genetics Concept Assessment: A New Concept Inventory for Gauging Student Understanding of Genetics
Source: Atypon-hosted journal article supplement (doi:10.1187/cbe.08-08-0045), 2008-12-01
Supplement: supp_mat_1.pdf [file supp_mat_1.pdf]

## **Appendix 1:**

### **A. Example of a GCA question (Question 8).**

A young man develops skin cancer that does not spread to any other tissues; the mutation responsible for the cancer arose in a single skin cell. If he and his wife (who does not have skin cancer) subsequently have children, which of the following statements is most correct?

- a) All the man's children will inherit the mutation responsible for skin cancer.
- b) All the man's children will inherit the mutation responsible for skin cancer if the mutation is dominant.
- c) Some of the man's children may inherit the mutation responsible for skin cancer depending on which of his chromosomes they inherit.
- d) None of the man's children will inherit the mutation responsible for skin cancer.

**B. Example of a GCA question (Question 14).** None of the 30 students we interviewed for this question chose answer a), although 30% of students did so on the pre-test.

Cystic fibrosis in humans is caused by mutations in a single gene and is inherited as an autosomal (non-sex-chromosome) recessive trait. A normal couple has two children. The first child has cystic fibrosis, and the second child is unaffected. What is the probability that the second child is a carrier (heterozygous) for the mutation that causes the disease?

- a) 1/4
- b) 1/2

c)  $\frac{2}{3}$

d)  $\frac{3}{4}$

e) 1
